# Supplementary material for: Inhibitory effects of superoxide dismutase 3 on Propionibacterium acnes-induced skin inflammation
Source: PubMed Central journal article supplement (PMC5838256; doi:10.1038/s41598-018-22132-z), 2018-03-05
Supplement: 41598_2018_22132_MOESM1_ESM.pdf [file 41598_2018_22132_MOESM1_ESM.pdf]

## Supplementary Materials for

### **Inhibitory effects of superoxide dismutase 3 on *Propionibacterium acnes*-induced skin inflammation**

Cuong Thach Nguyen<sup>1</sup>, Shyam Kishor Sah<sup>1</sup>, Christos C. Zouboulis<sup>2</sup>, Tae-Yoon Kim<sup>1</sup>

<sup>1</sup>Department of Dermatology, College of Medicine, The Catholic University of Korea, Seoul 137-040, South Korea.

<sup>2</sup>Departments of Dermatology, Venereology, Allergology and Immunology, Dessau Medical Center, Brandenburg Medical School Theodor Fontane, 06847 Dessau, Germany

This PDF file includes:

Figs. S1 to S6

Figure legends for Figs. S1 to S6

# Supp Fig S1

**A**

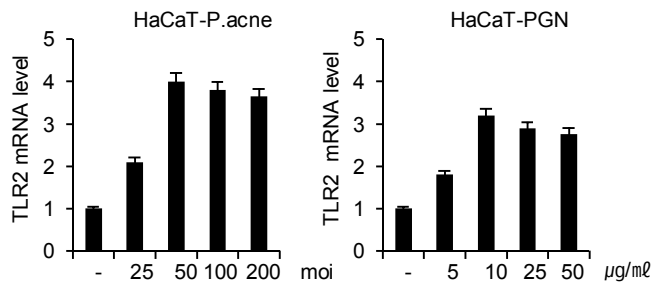

**B**

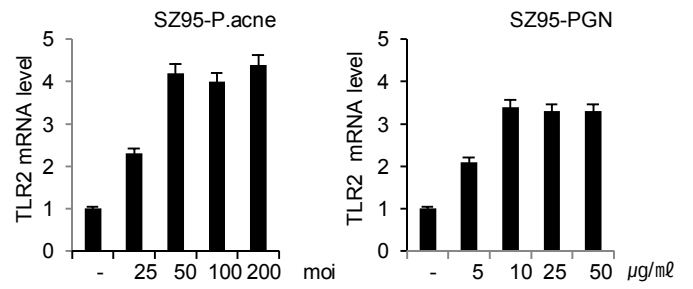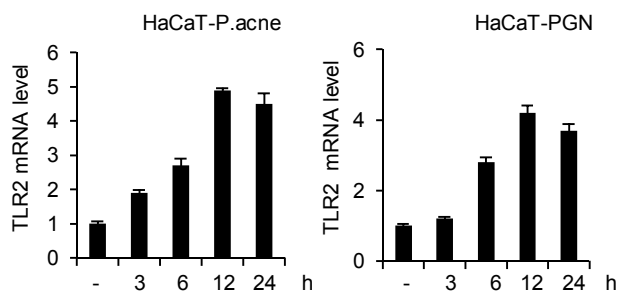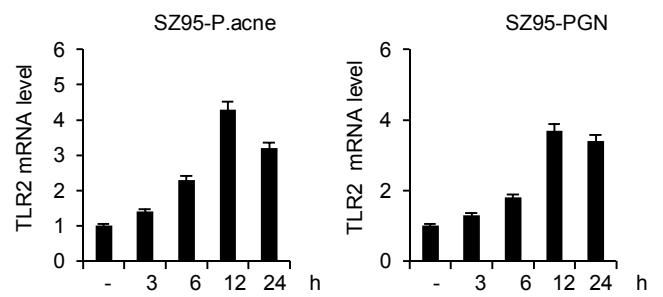

**C**

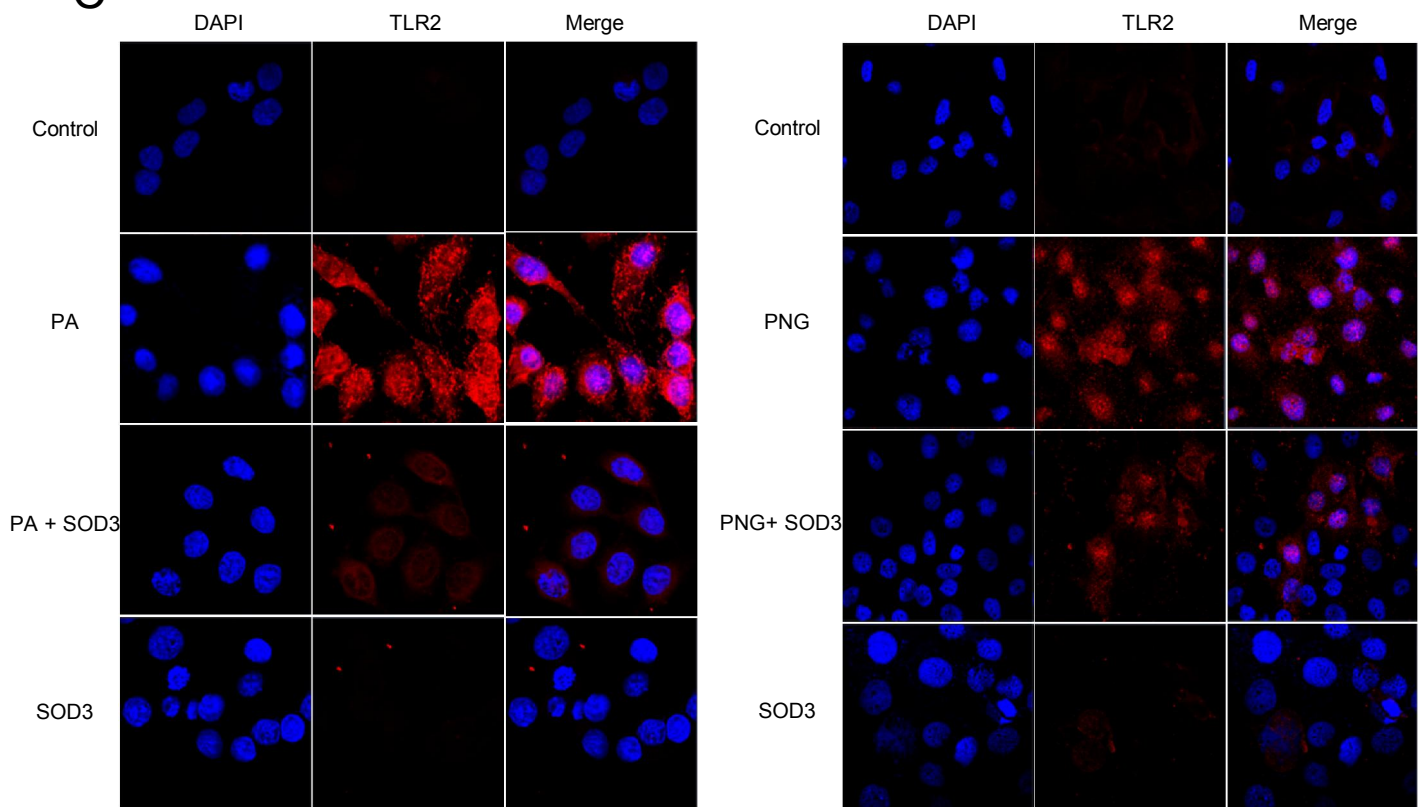

# Supp Fig. S2

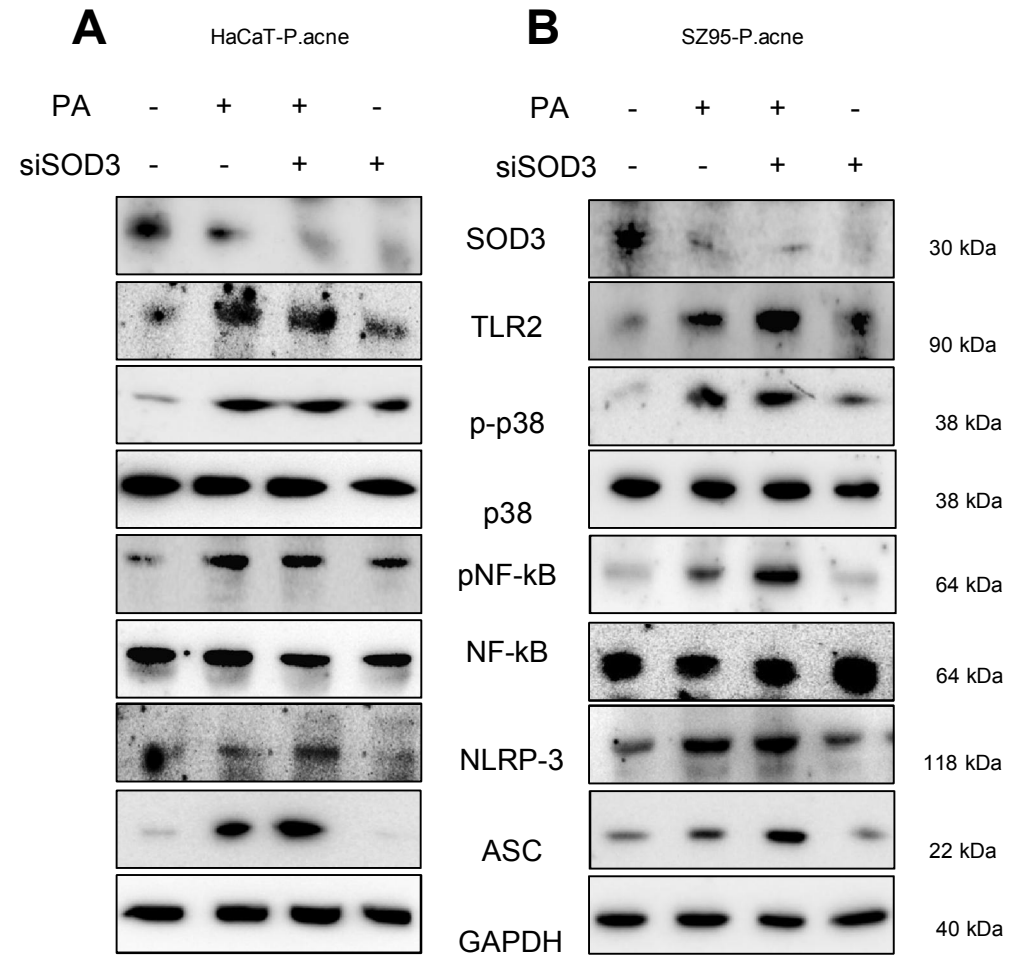

### Supp Fig S3

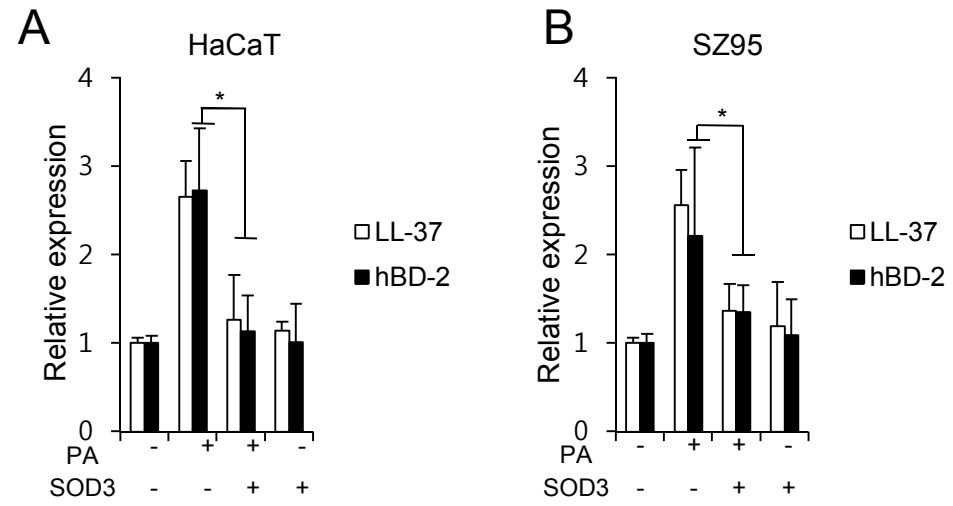

# Supp Fig S4

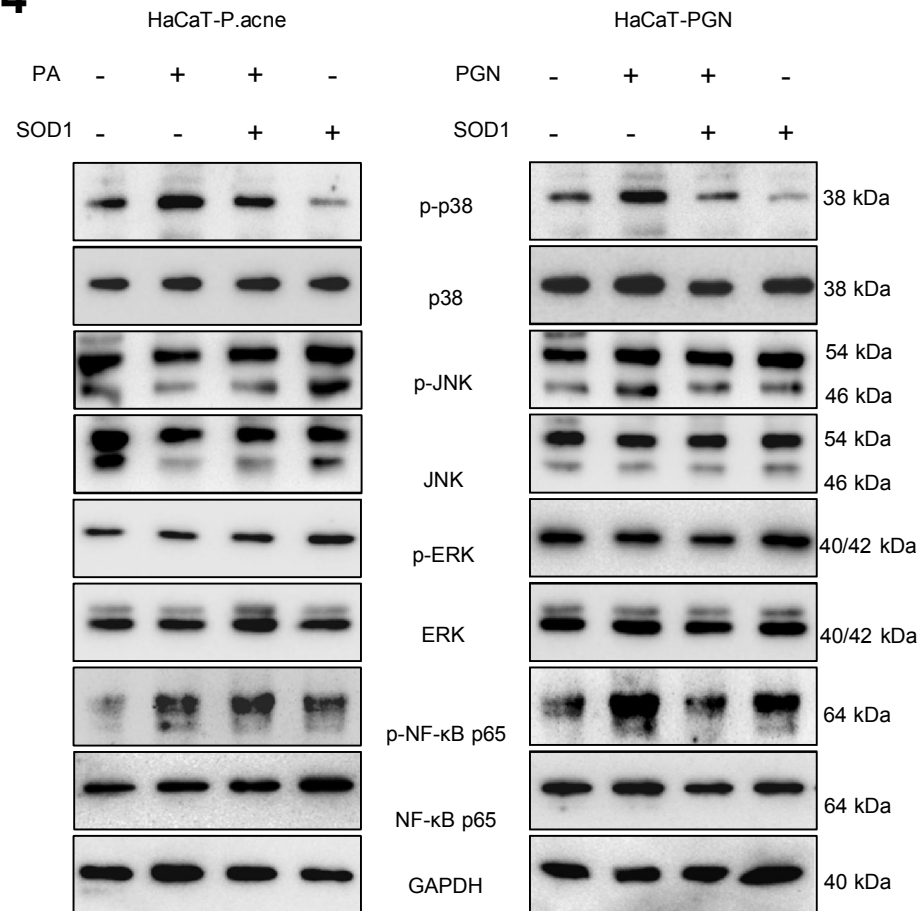

# Supp Fig S5

## A. Band density of Fig. 1

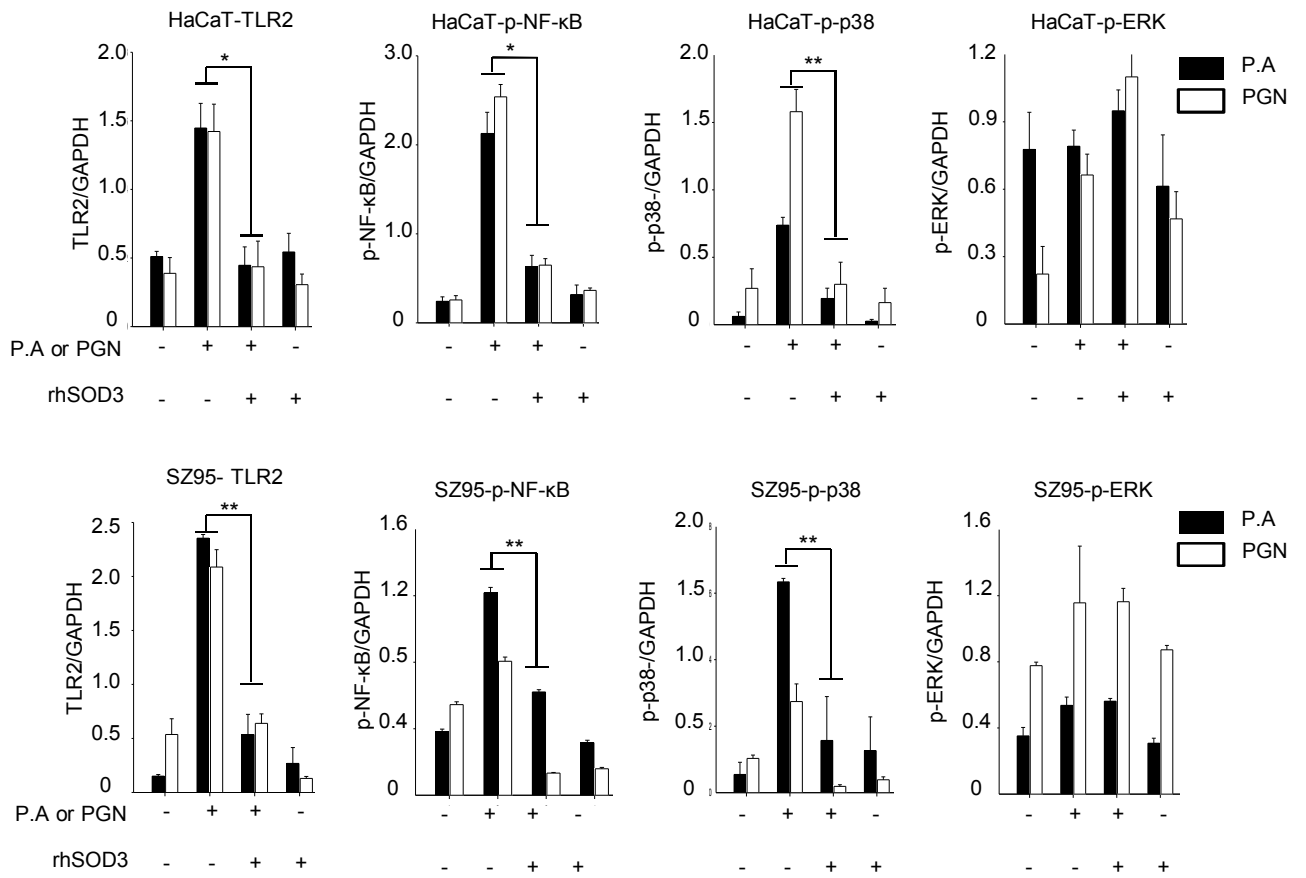

## B. Band density of Fig. 2

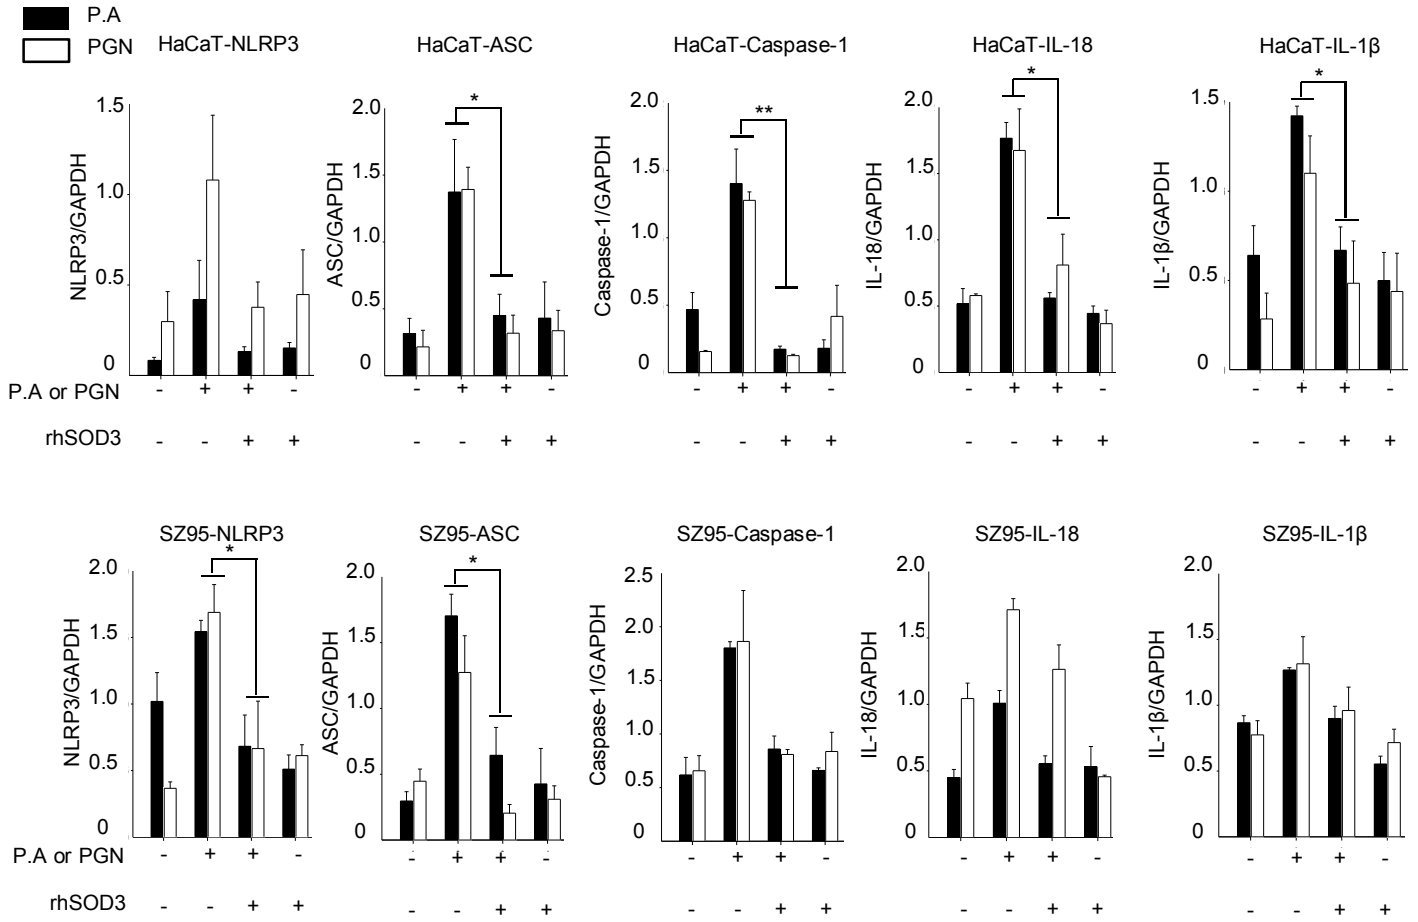

### C. Band density of Fig. 6

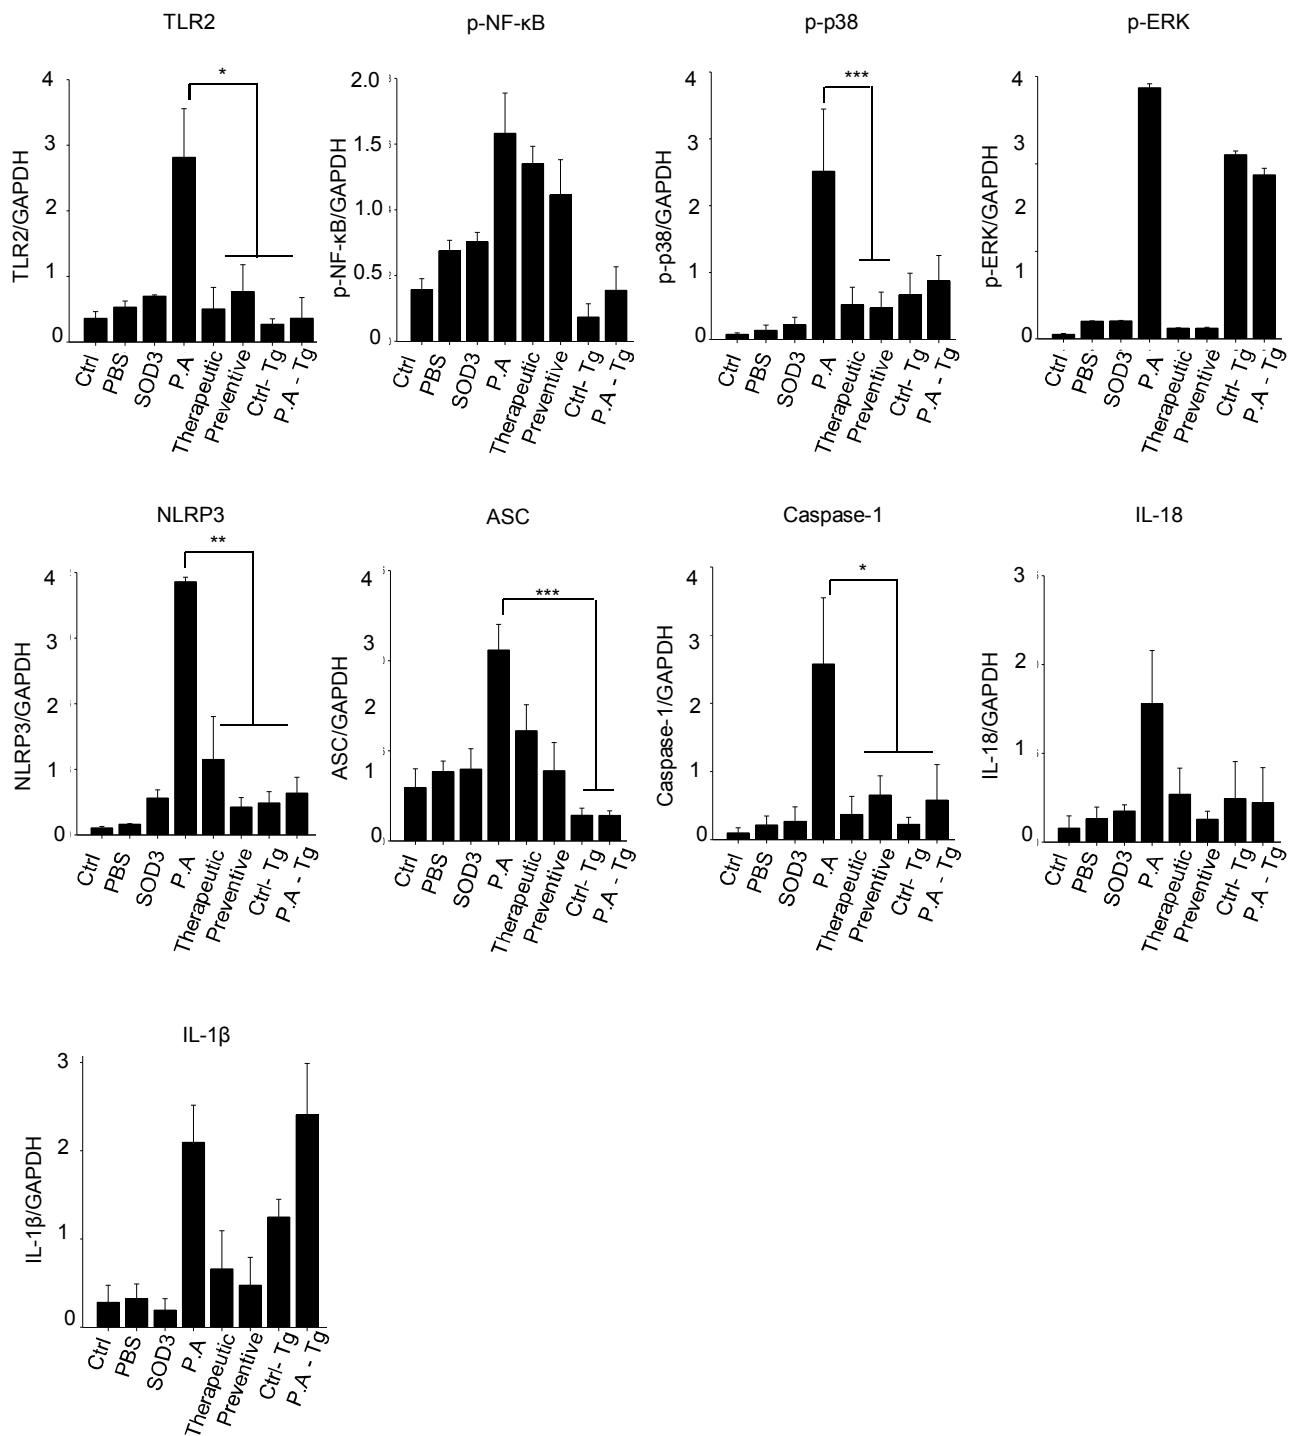



### D. Band density of Sup. Fig. 3

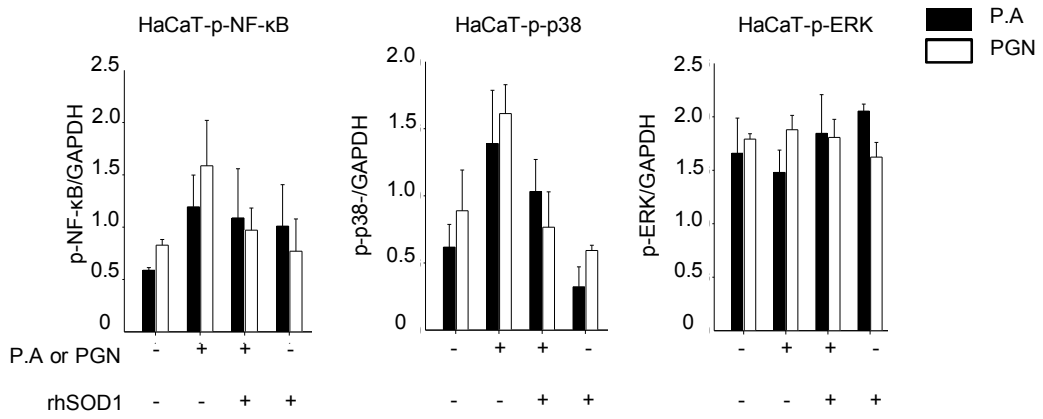

# Supp Fig S6

Figure 1B

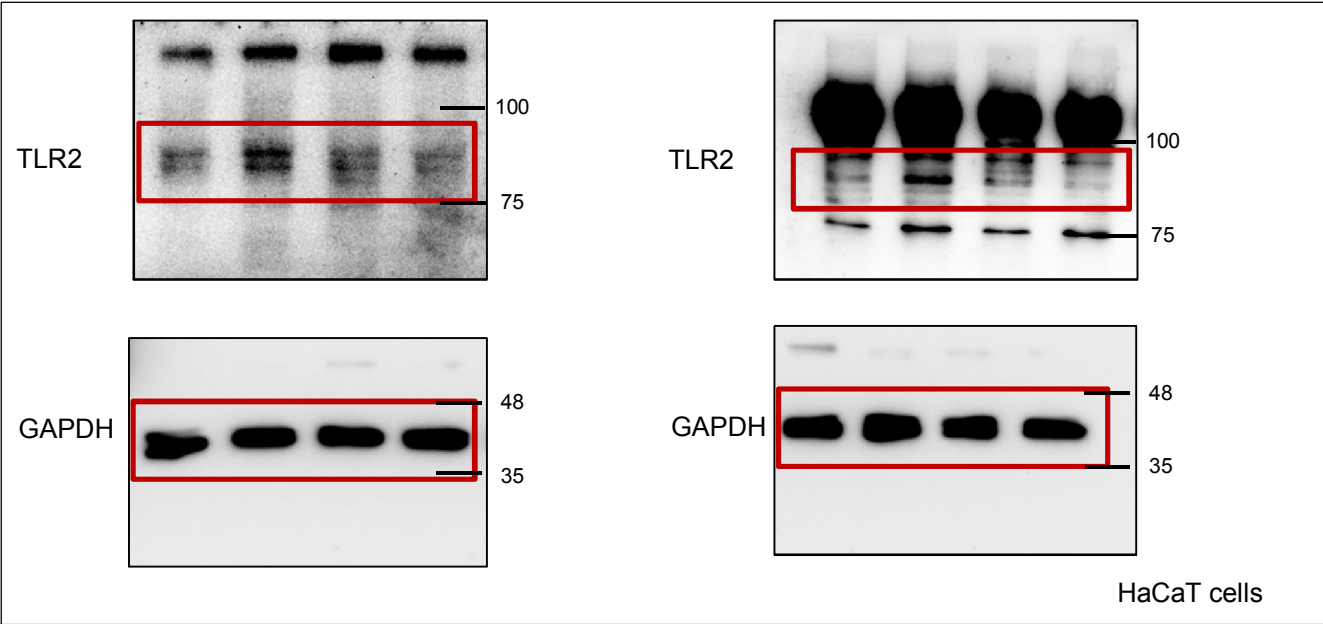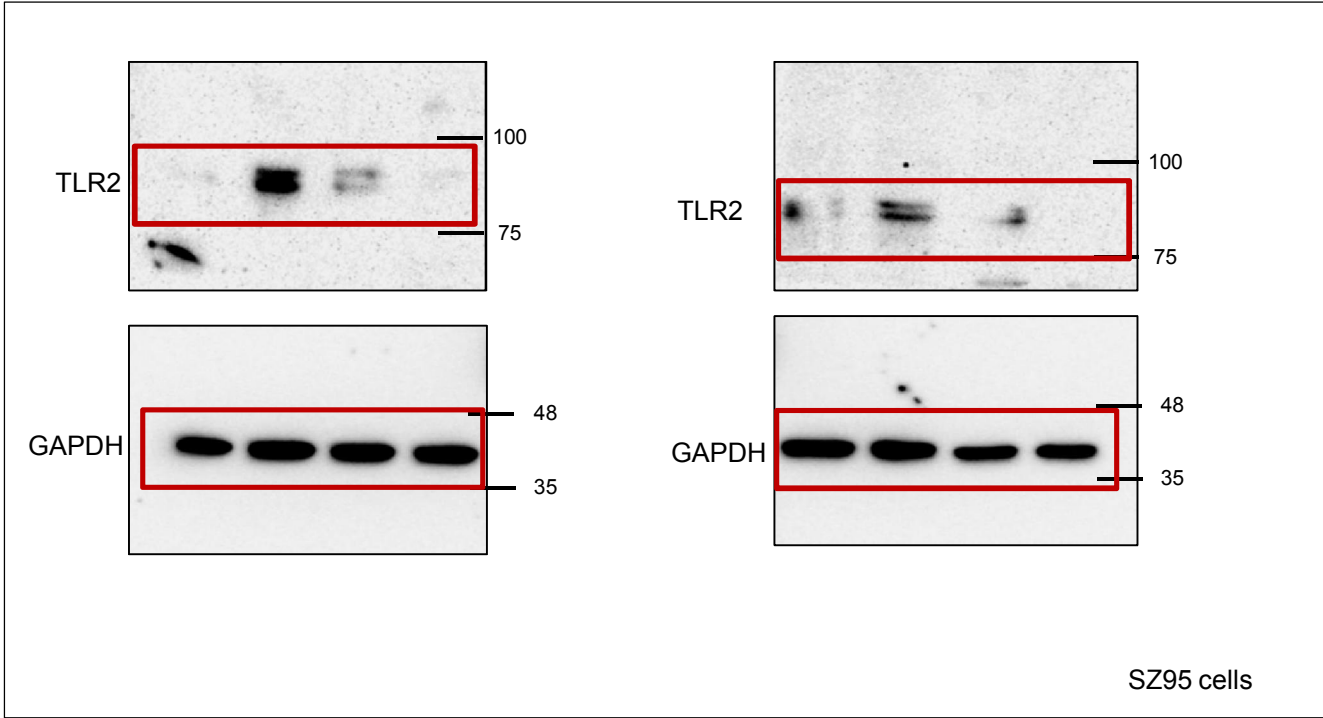

**Figure 1C**

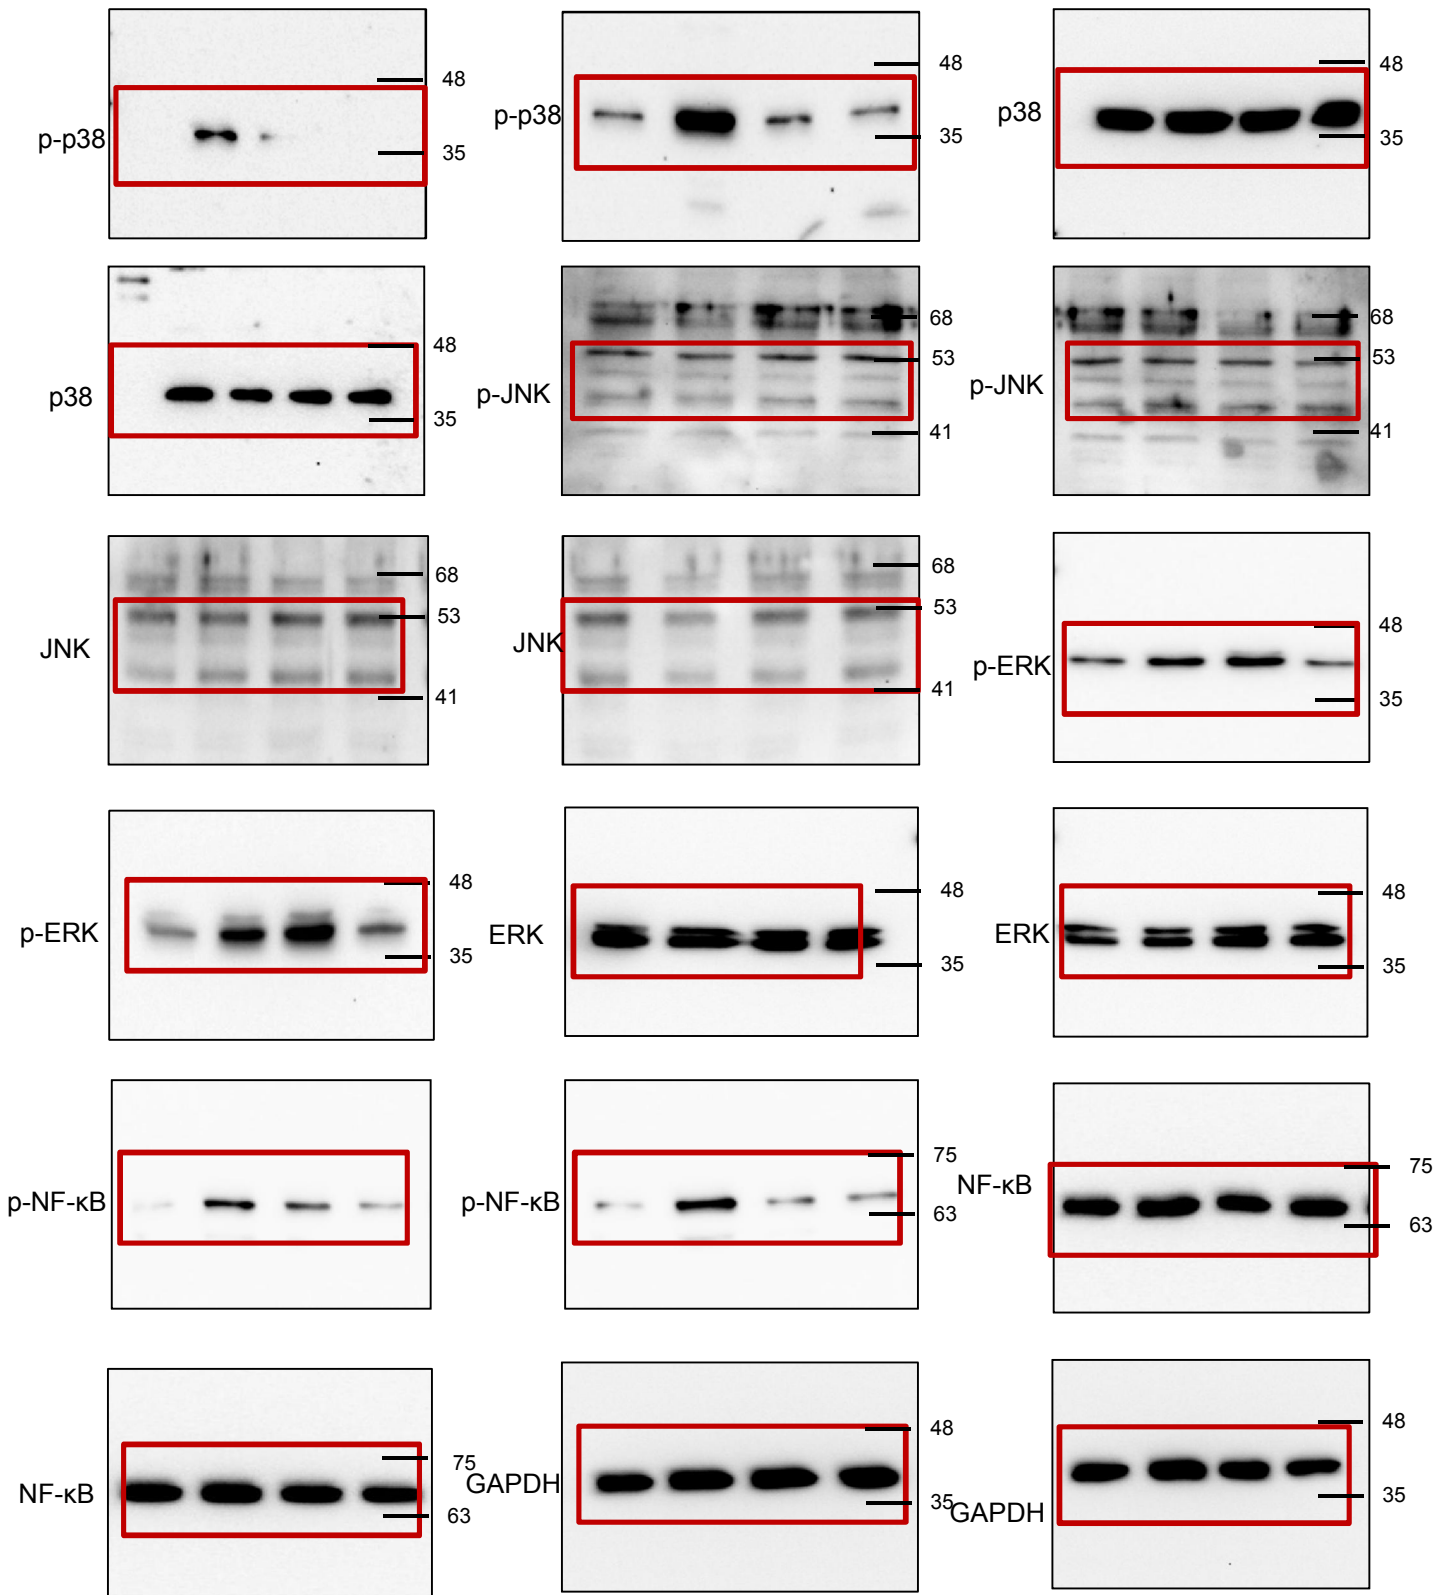

**Figure 1D**

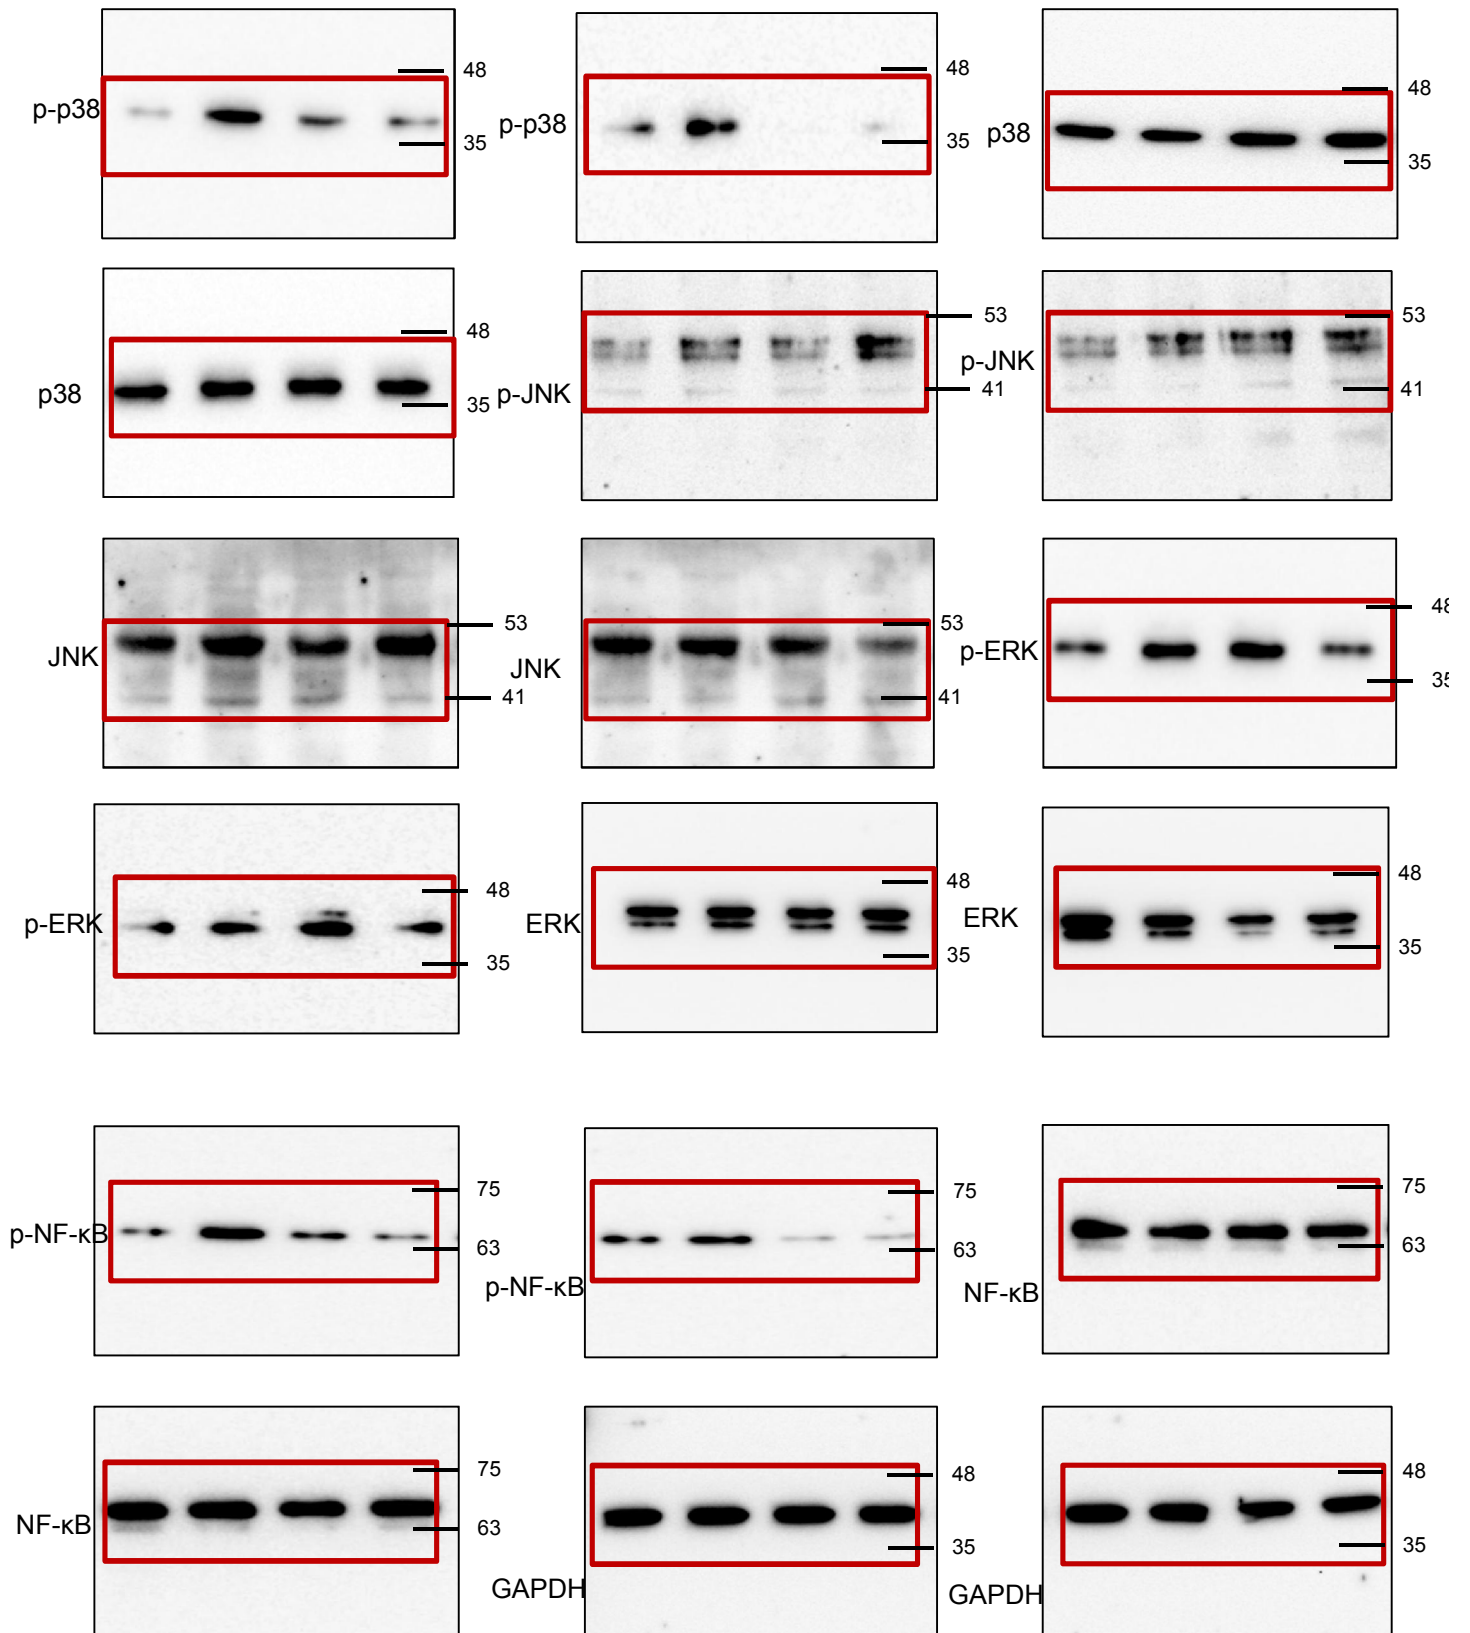

**Figure 2A**

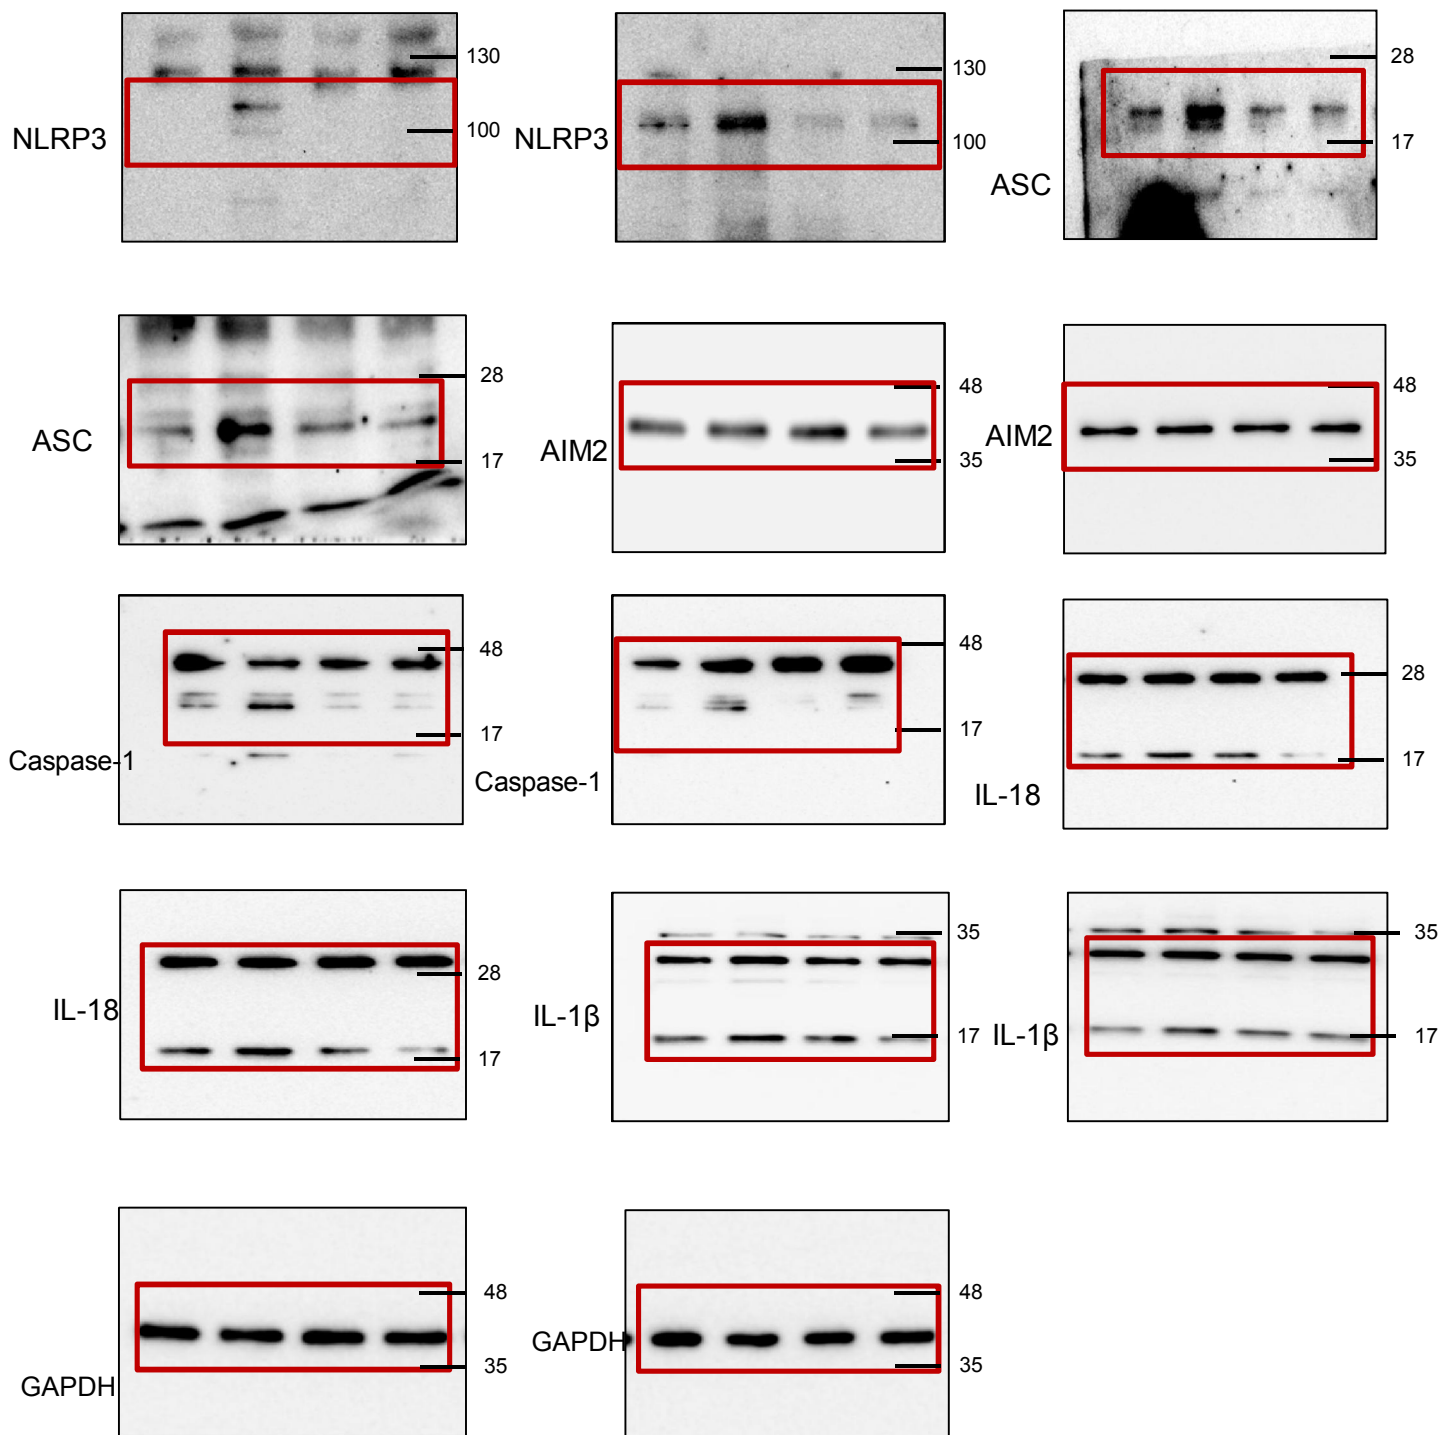

**Figure 2B**

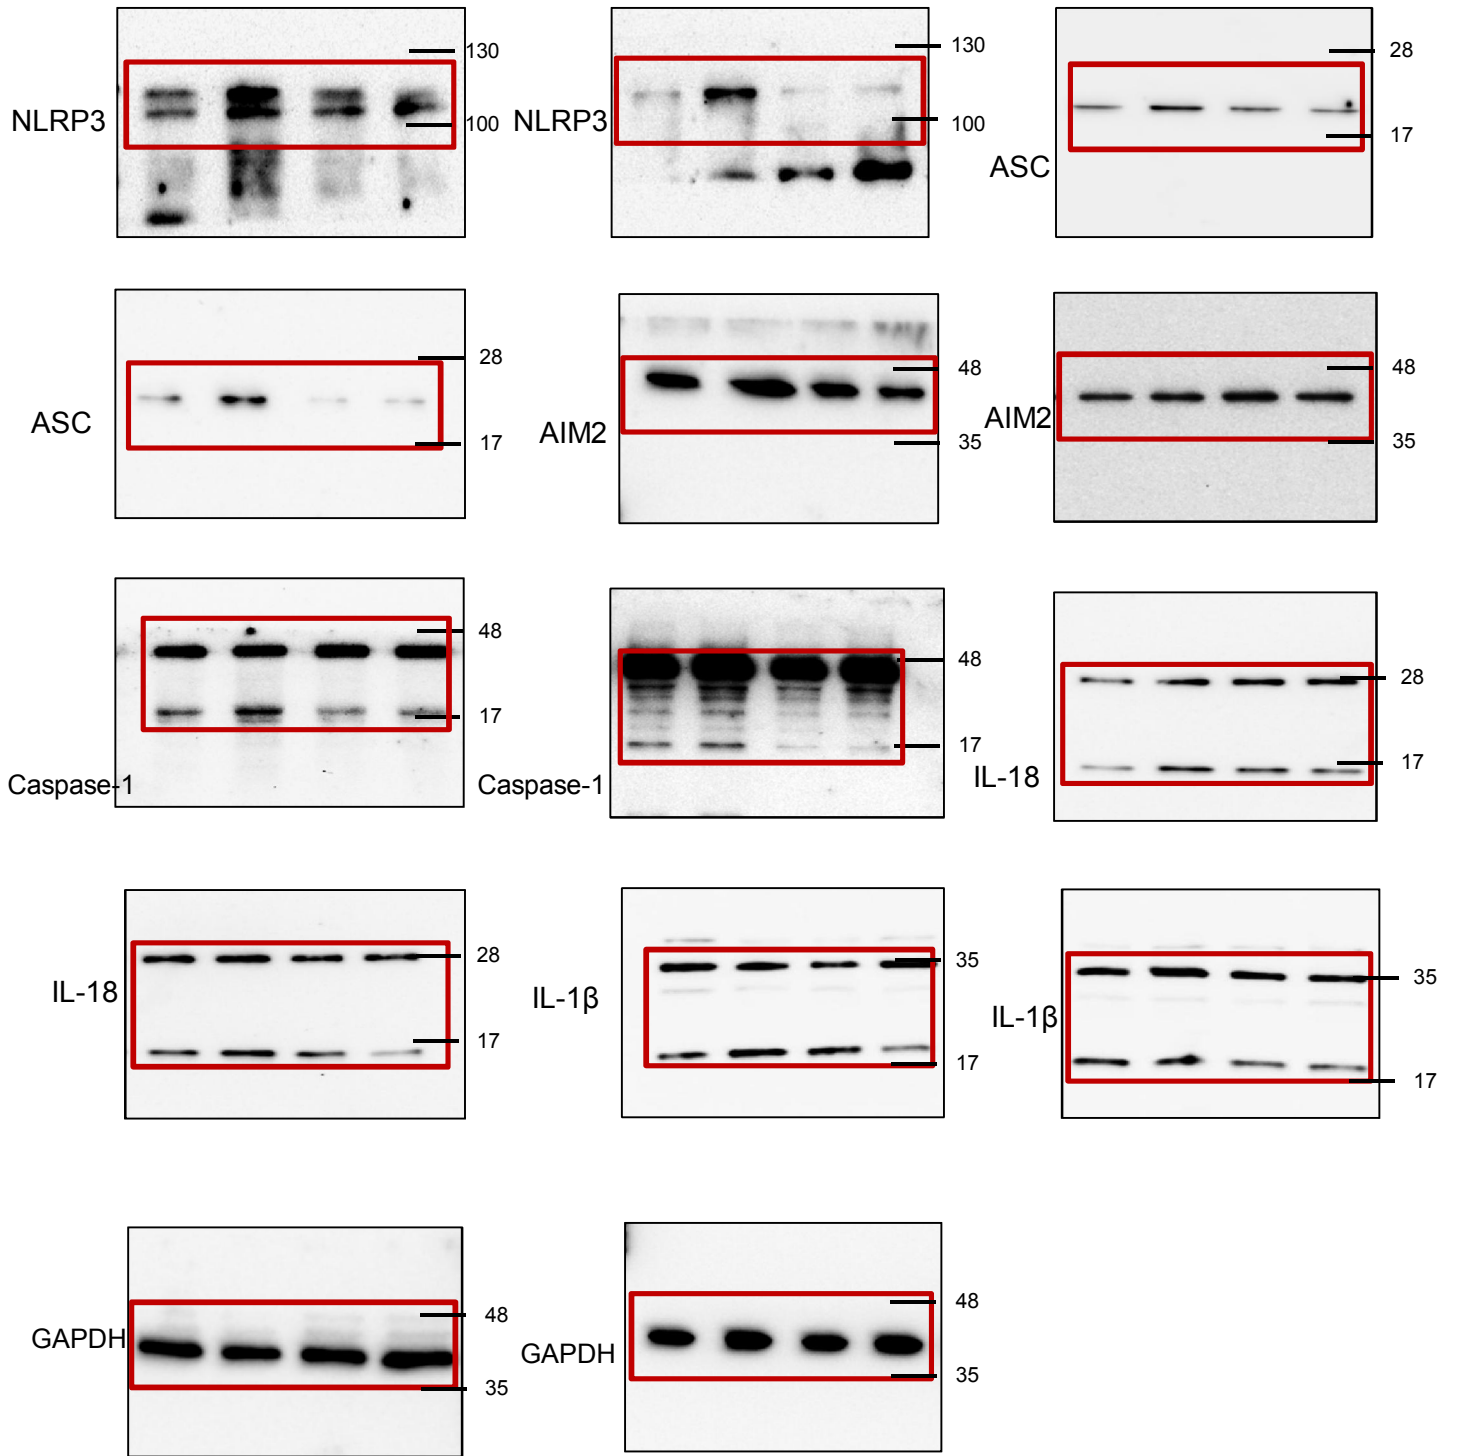

**Figure 6A**

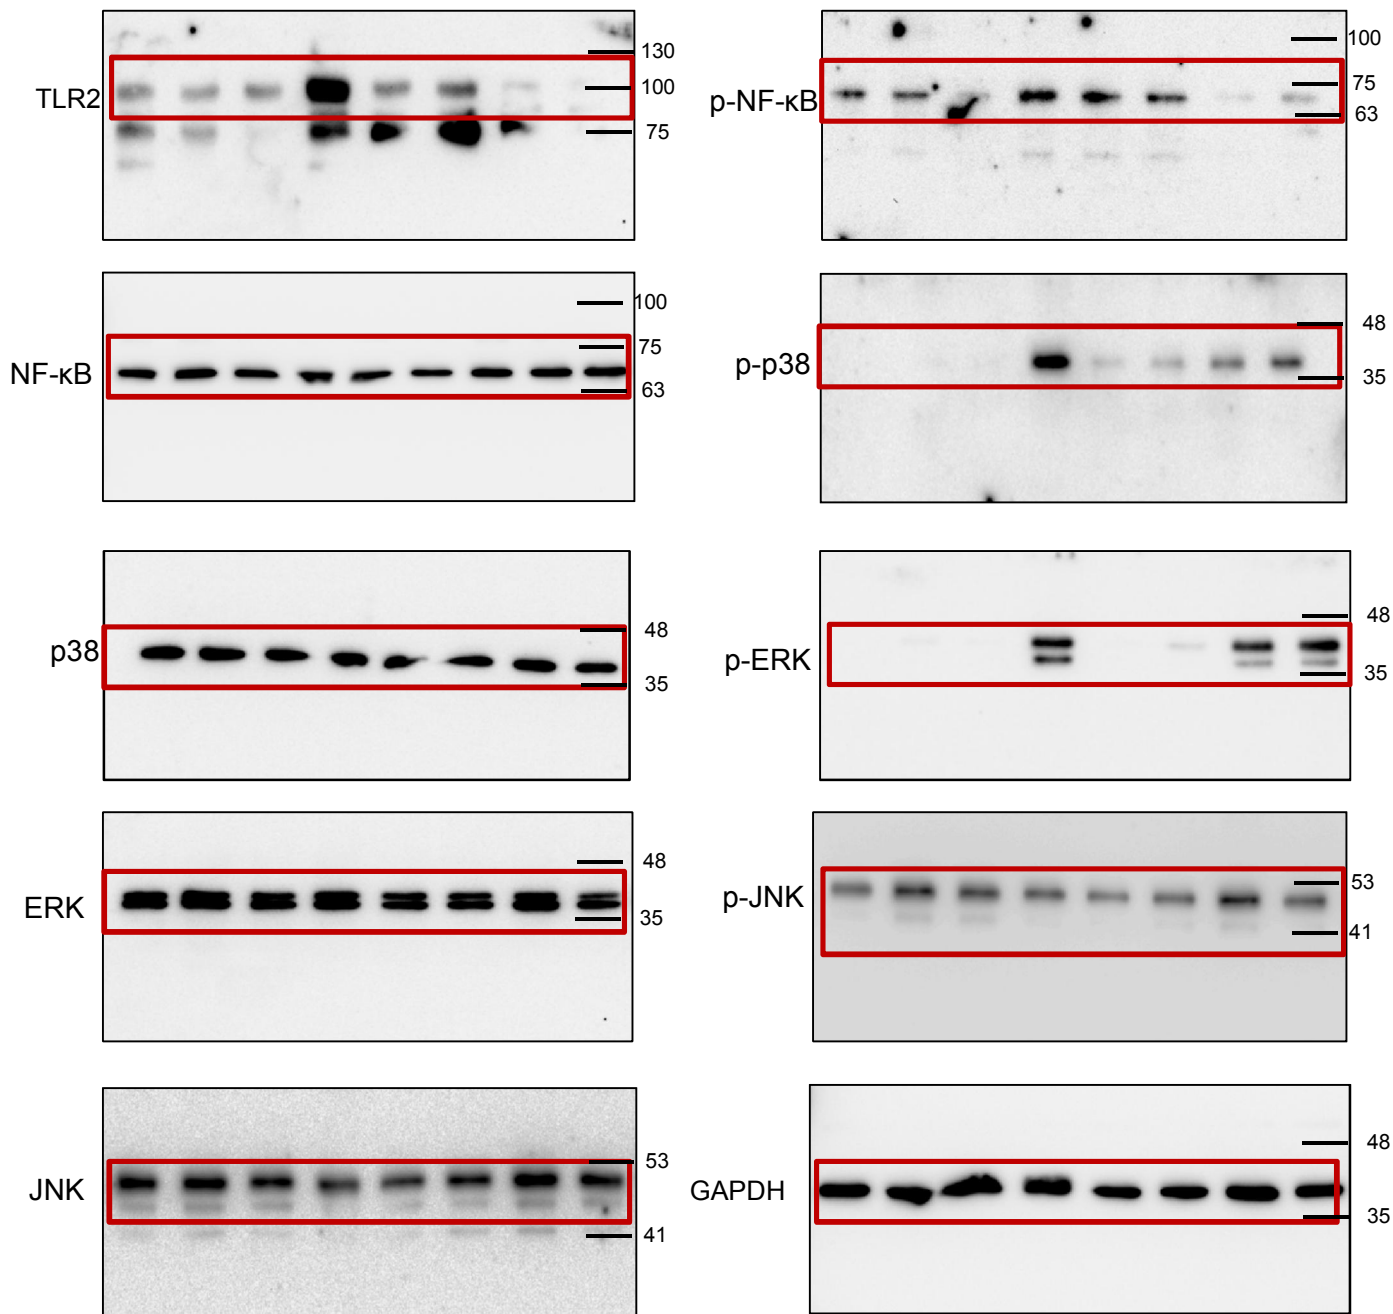

**Figure 6B**

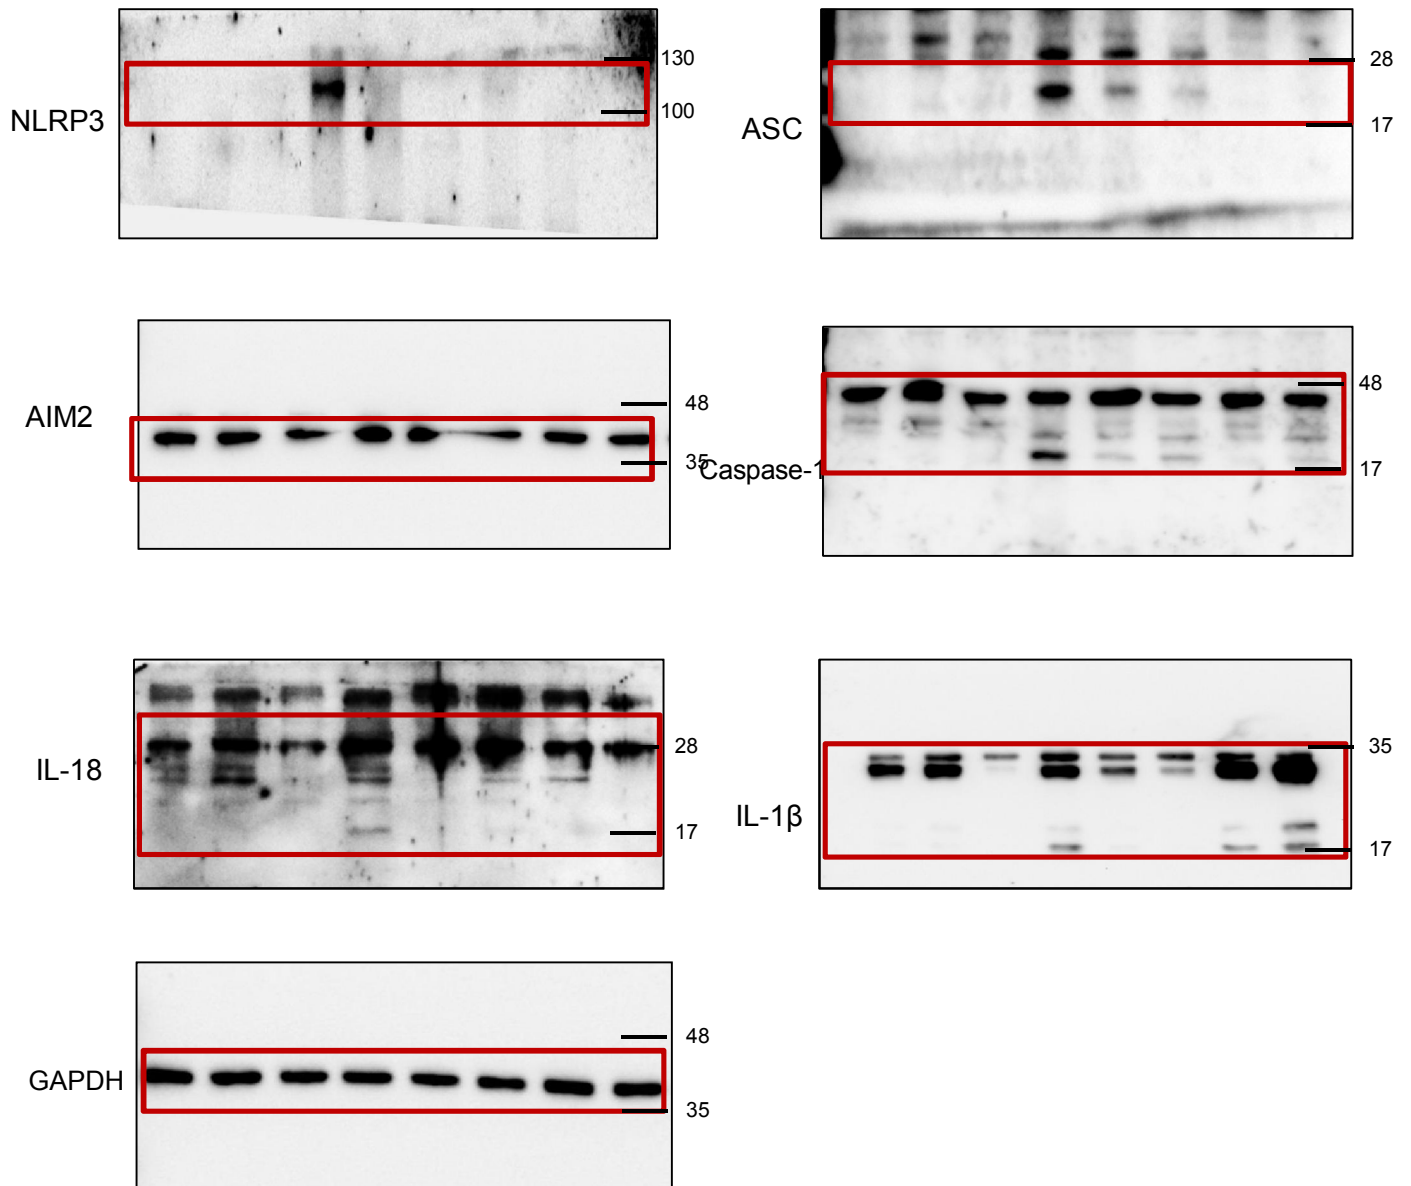



**Figure S2**

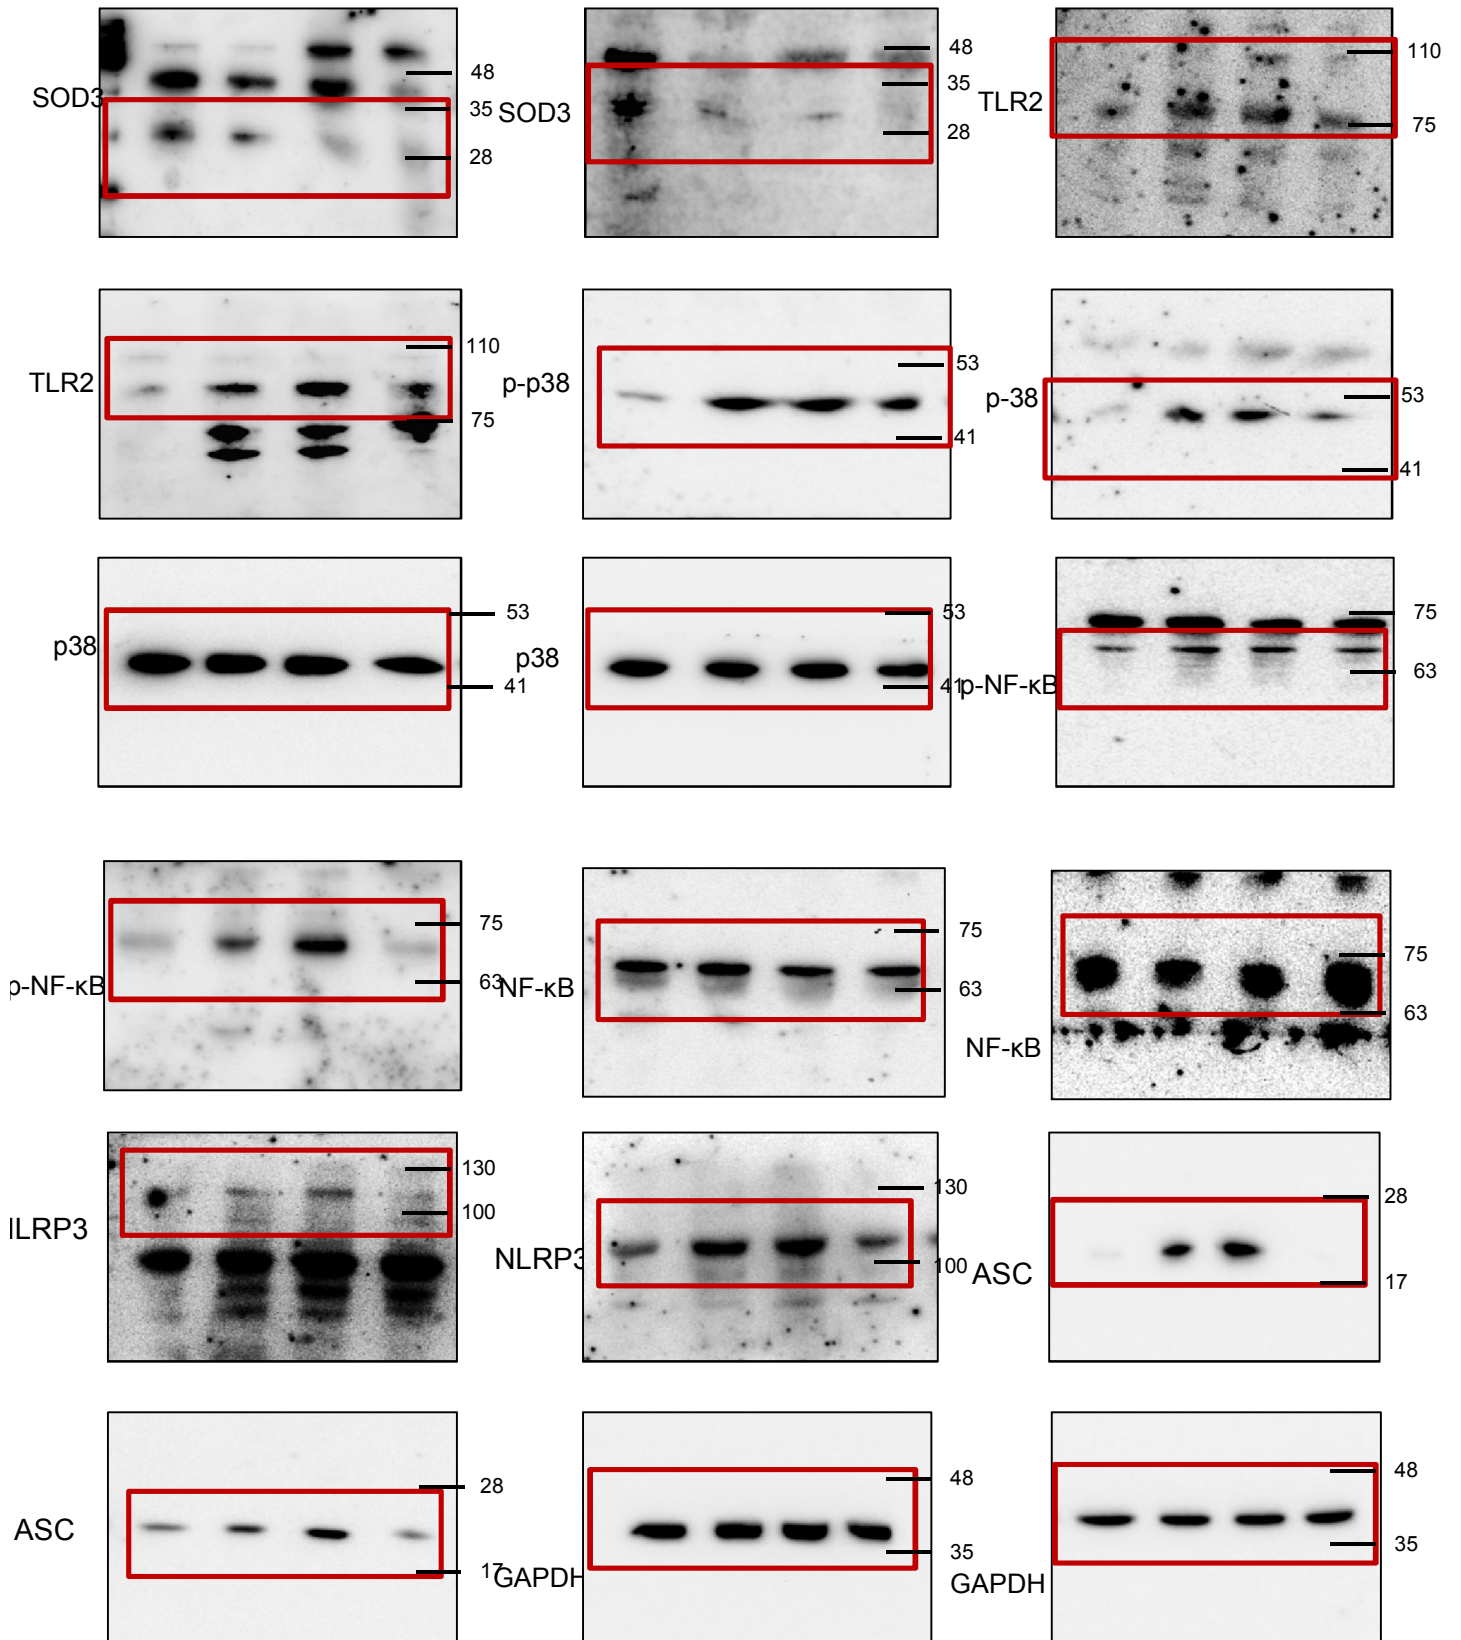

Figure S4

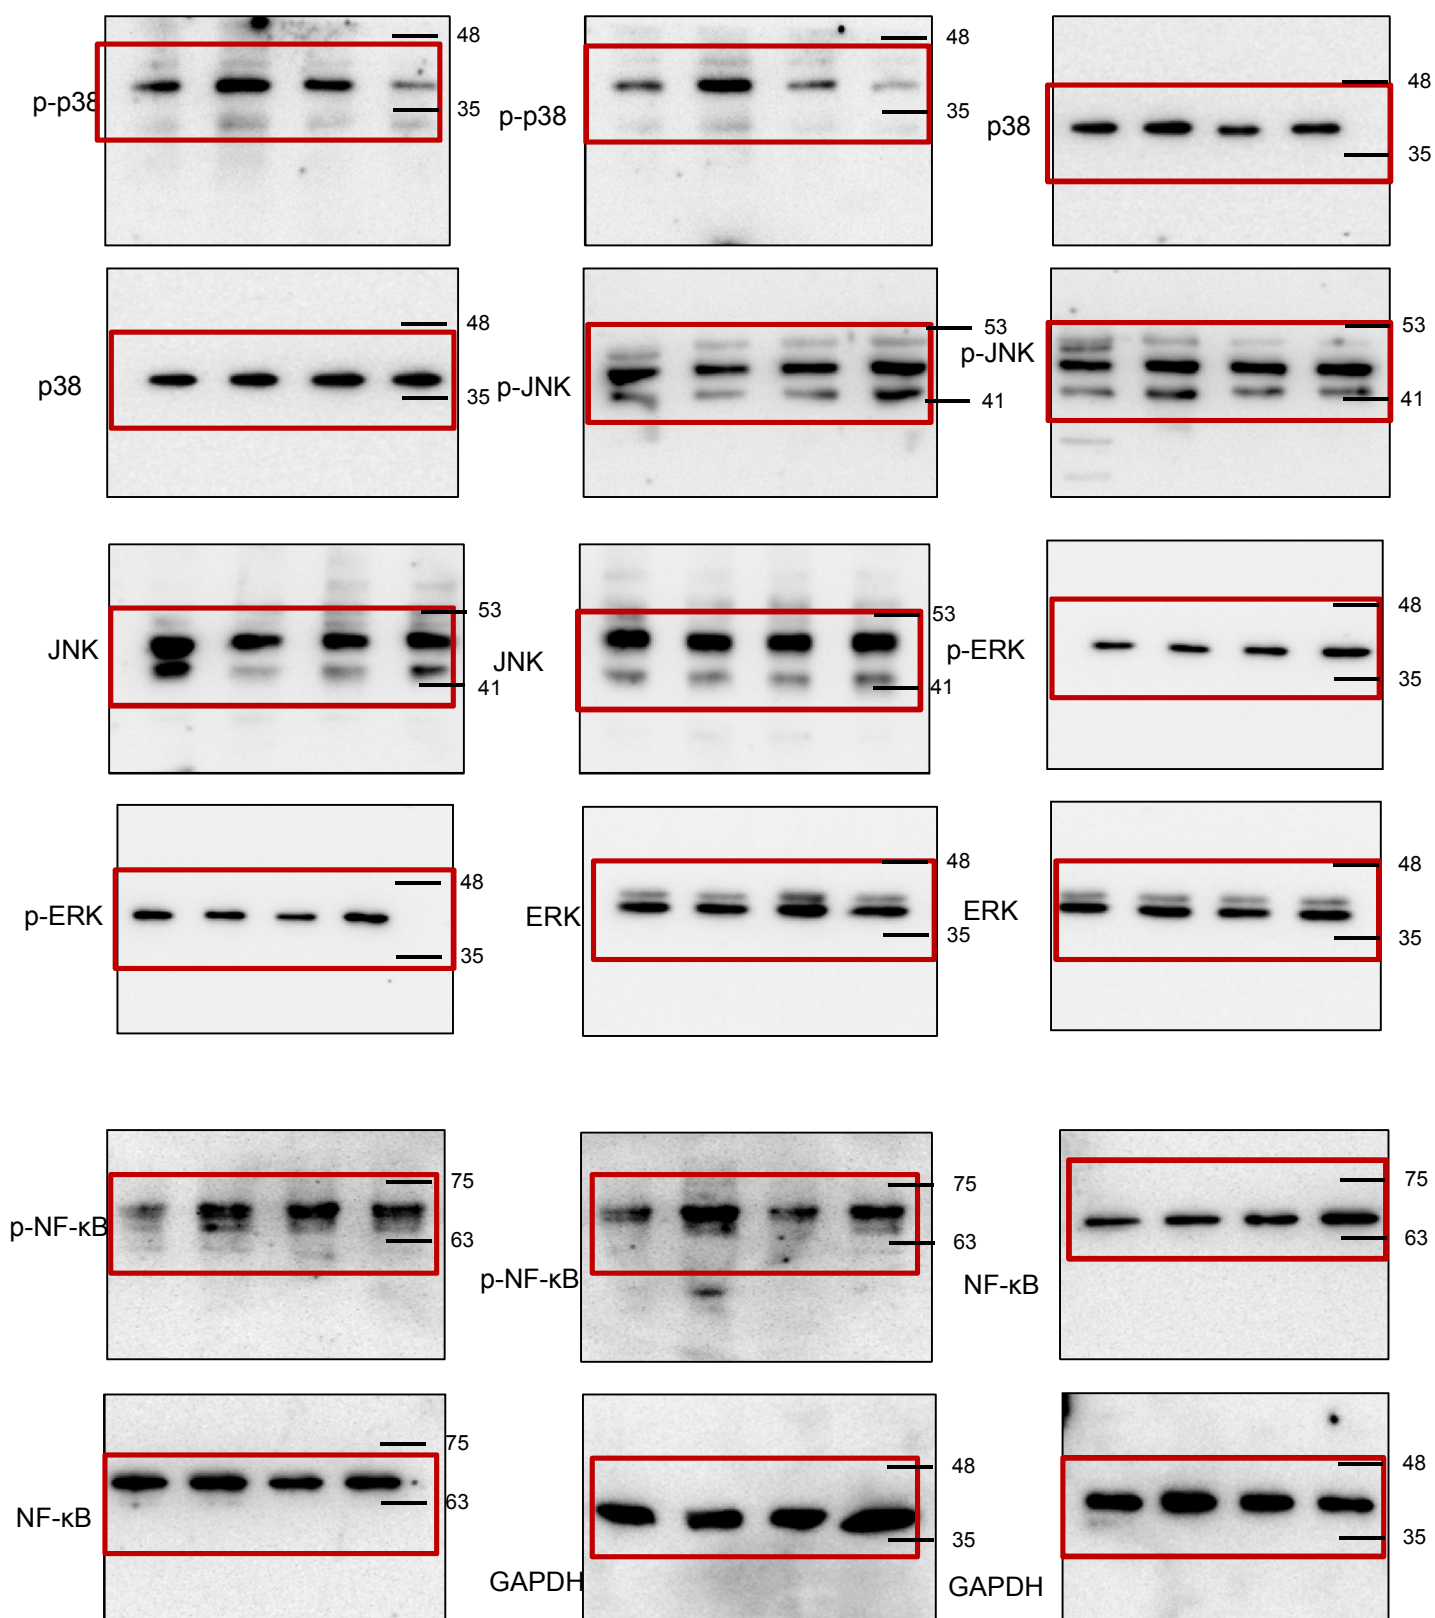

1 **SUPPLEMENT FIGURE AND LEGENDS**

2 **Supplementary Figure 1: Expression of TLR-2 in *P. acnes* treated HaCaT and SZ95 cells.**

3 (A) HaCaT and (B) SZ95 cells were infected with heat-killed *P. acnes* (25, 50, 100, 200 MOI) or  
4 peptidoglycan (5, 10, 25, 50  $\mu\text{g}/\text{mL}$ ) in a time-dependent manner. Expression of TLR-2 was  
5 analyzed by qRT-PCR. (C) HaCaT cells were pretreated with SOD3 (200 U/mL) and incubated  
6 with heat-killed *P. acnes* (100 MOI) or peptidoglycan (10  $\mu\text{g}/\text{mL}$ ) for 24 h. Expression of TLR-2  
7 was analyzed by confocal microscope. All data represent mean  $\pm$  S.D. of three independent  
8 experiments \* $P < 0.05$ , \*\* $P < 0.01$ , \*\*\* $P < 0.001$ .

9 **Supplementary Figure 2: Effects of SOD3 knock-down on inflammatory markers.** (A)

10 HaCaT and SZ95 (B) cells were knocked-down with siRNA SOD3 (30 nM) for 24h and  
11 incubated with heat-killed *P. acnes* (100 MOI) or peptidoglycan (10  $\mu\text{g}/\text{mL}$ ) for additional 24 h.  
12 Expression of TLR-2, p-NF- $\kappa\text{B}$ , and MAPKs proteins were analyzed by Western blot. Full-  
13 length blots are presented in Supplementary Figure S6. All data represent of three independent  
14 experiments.

15 **Supplementary Figure 3: SOD3 inhibited the expression of LL-37 and hBD-2 in *P. acnes***

16 **treated HaCaT and SZ95 cells.** (A) HaCaT and SZ95 (B) cells were pretreated with SOD3 (200  
17 U/mL) and incubated with heat-killed *P. acnes* (100 MOI) or peptidoglycan (10  $\mu\text{g}/\text{mL}$ ) for 24 h.  
18 Expression of LL-37 and hBD-2 were analyzed by qRT-PCR. All data represent the mean  $\pm$  S.D.  
19 of three independent experiments \* $P < 0.05$ , \*\* $P < 0.01$ , \*\*\* $P < 0.001$ .

20 **Supplementary Figure 4: SOD1 did not inhibit p-NF- $\kappa\text{B}$  and p-p38 expression in HaCaT**

21 **cells.** HaCaT cells were pretreated with SOD1 (200 U/mL) and incubated with heat-killed *P.*

22 *acnes* (100 MOI) or peptidoglycan (10 µg/mL) for 24 h. Expression of p-NF-κB and MAPK  
23 proteins were analyzed by Western blot. Band density of Western blot data is shown in  
24 Supplemental Figure S5D. Full-length blots are presented in Supplementary Figure S6. All data  
25 represent of three independent experiments.

26 **Supplementary Figure 5: Protein band density of western blot data.** ImageJ was used to  
27 measure the band density of Western blot data from Fig. 1, Fig. 2, Fig. 6, and Fig. S3. All data  
28 represent the mean ± S.D. of three independent experiments \*P<0.05, \*\*P<0.01, \*\*\*P<0.001

29 **Supplementary Figure 6:** Full-length blots of western blot data.
